# Supplementary material for: NUMB as a Therapeutic Target for Melanoma
Source: PubMed Central journal article supplement (PMC9704357; doi:10.1016/j.jid.2021.11.027), 2021-12-07

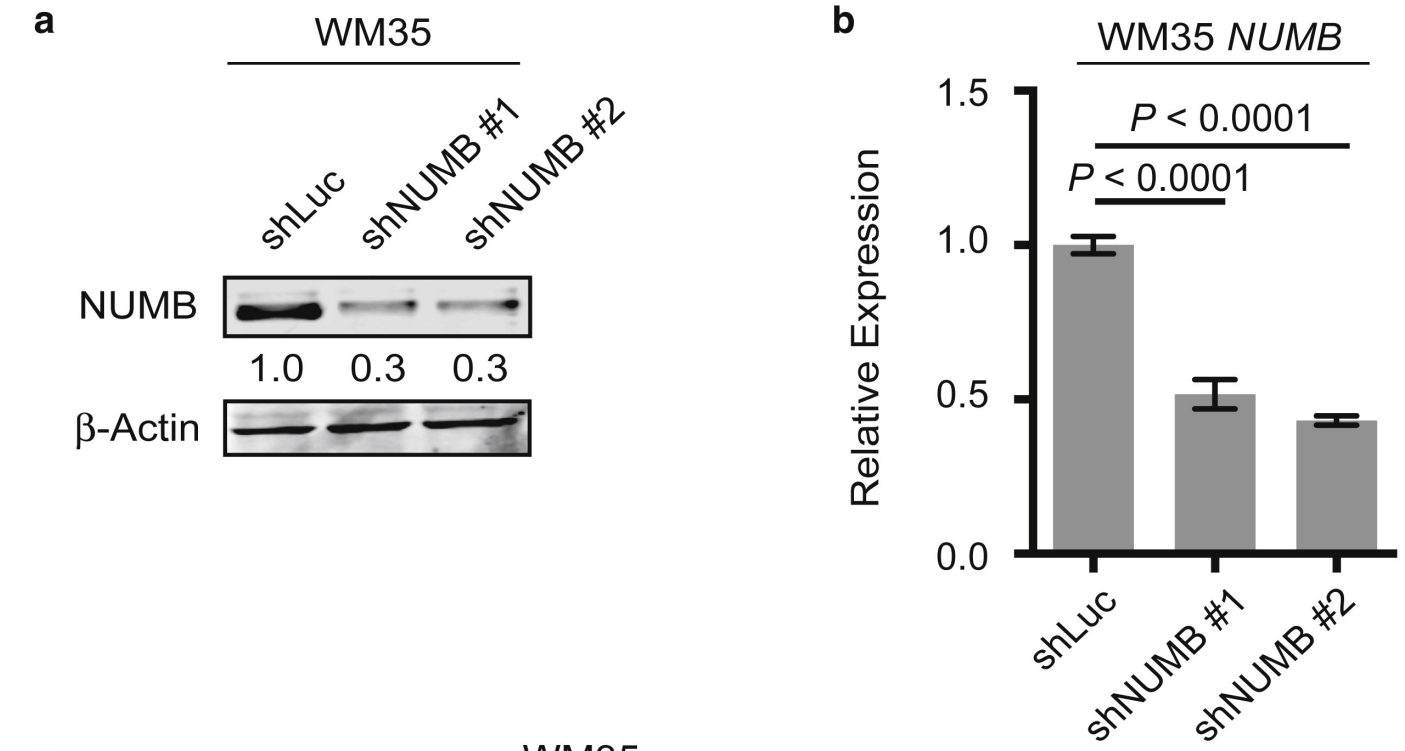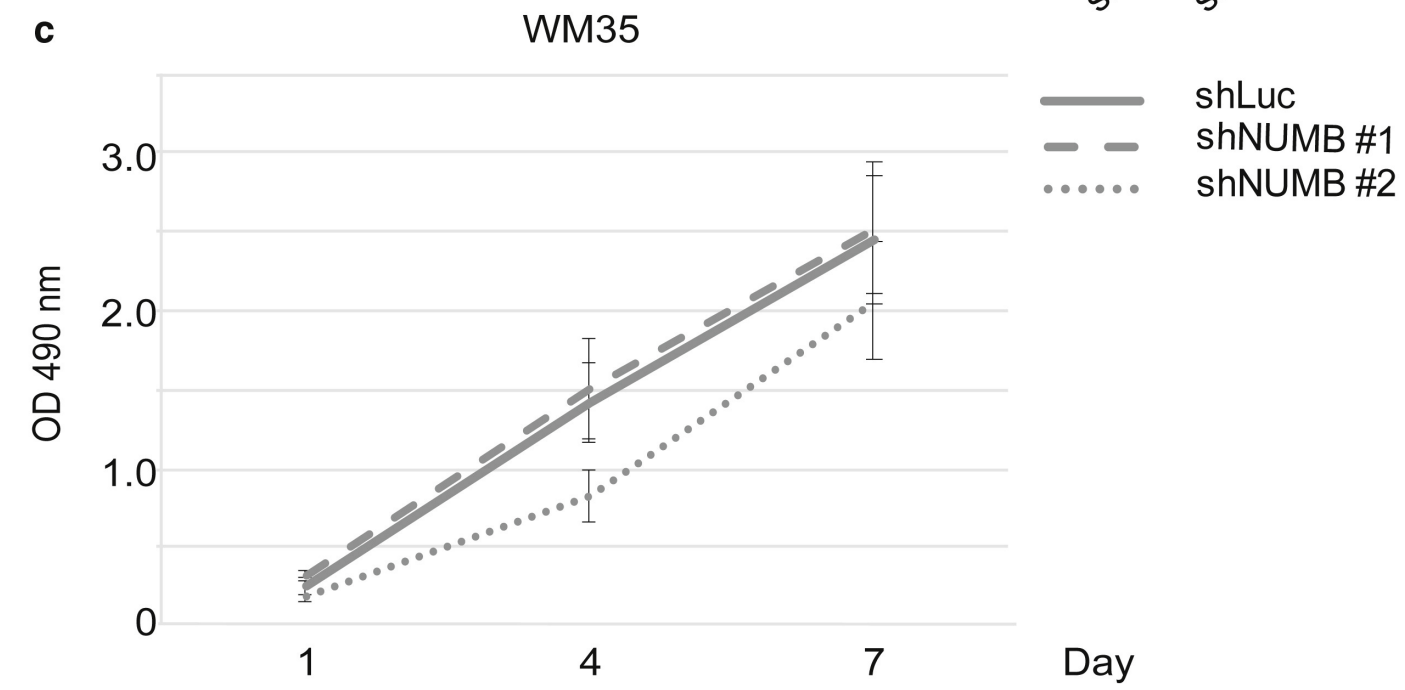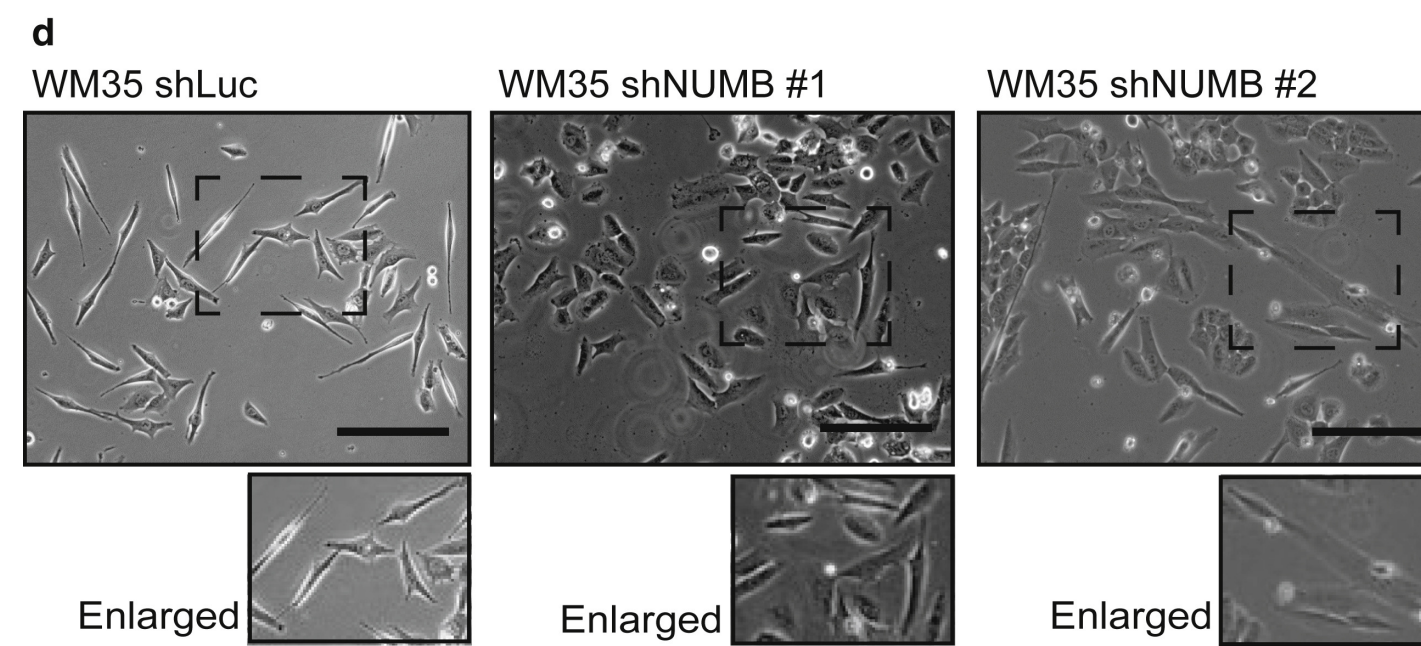

Supplement: NIHMS1823153-supplement-Figure_S2.pdf [file NIHMS1823153-supplement-Figure_S2.pdf]
