# Supplementary material for: NUMB as a Therapeutic Target for Melanoma
Source: PubMed Central journal article supplement (PMC9704357; doi:10.1016/j.jid.2021.11.027), 2021-12-07

# WM1799 *AXIN2*

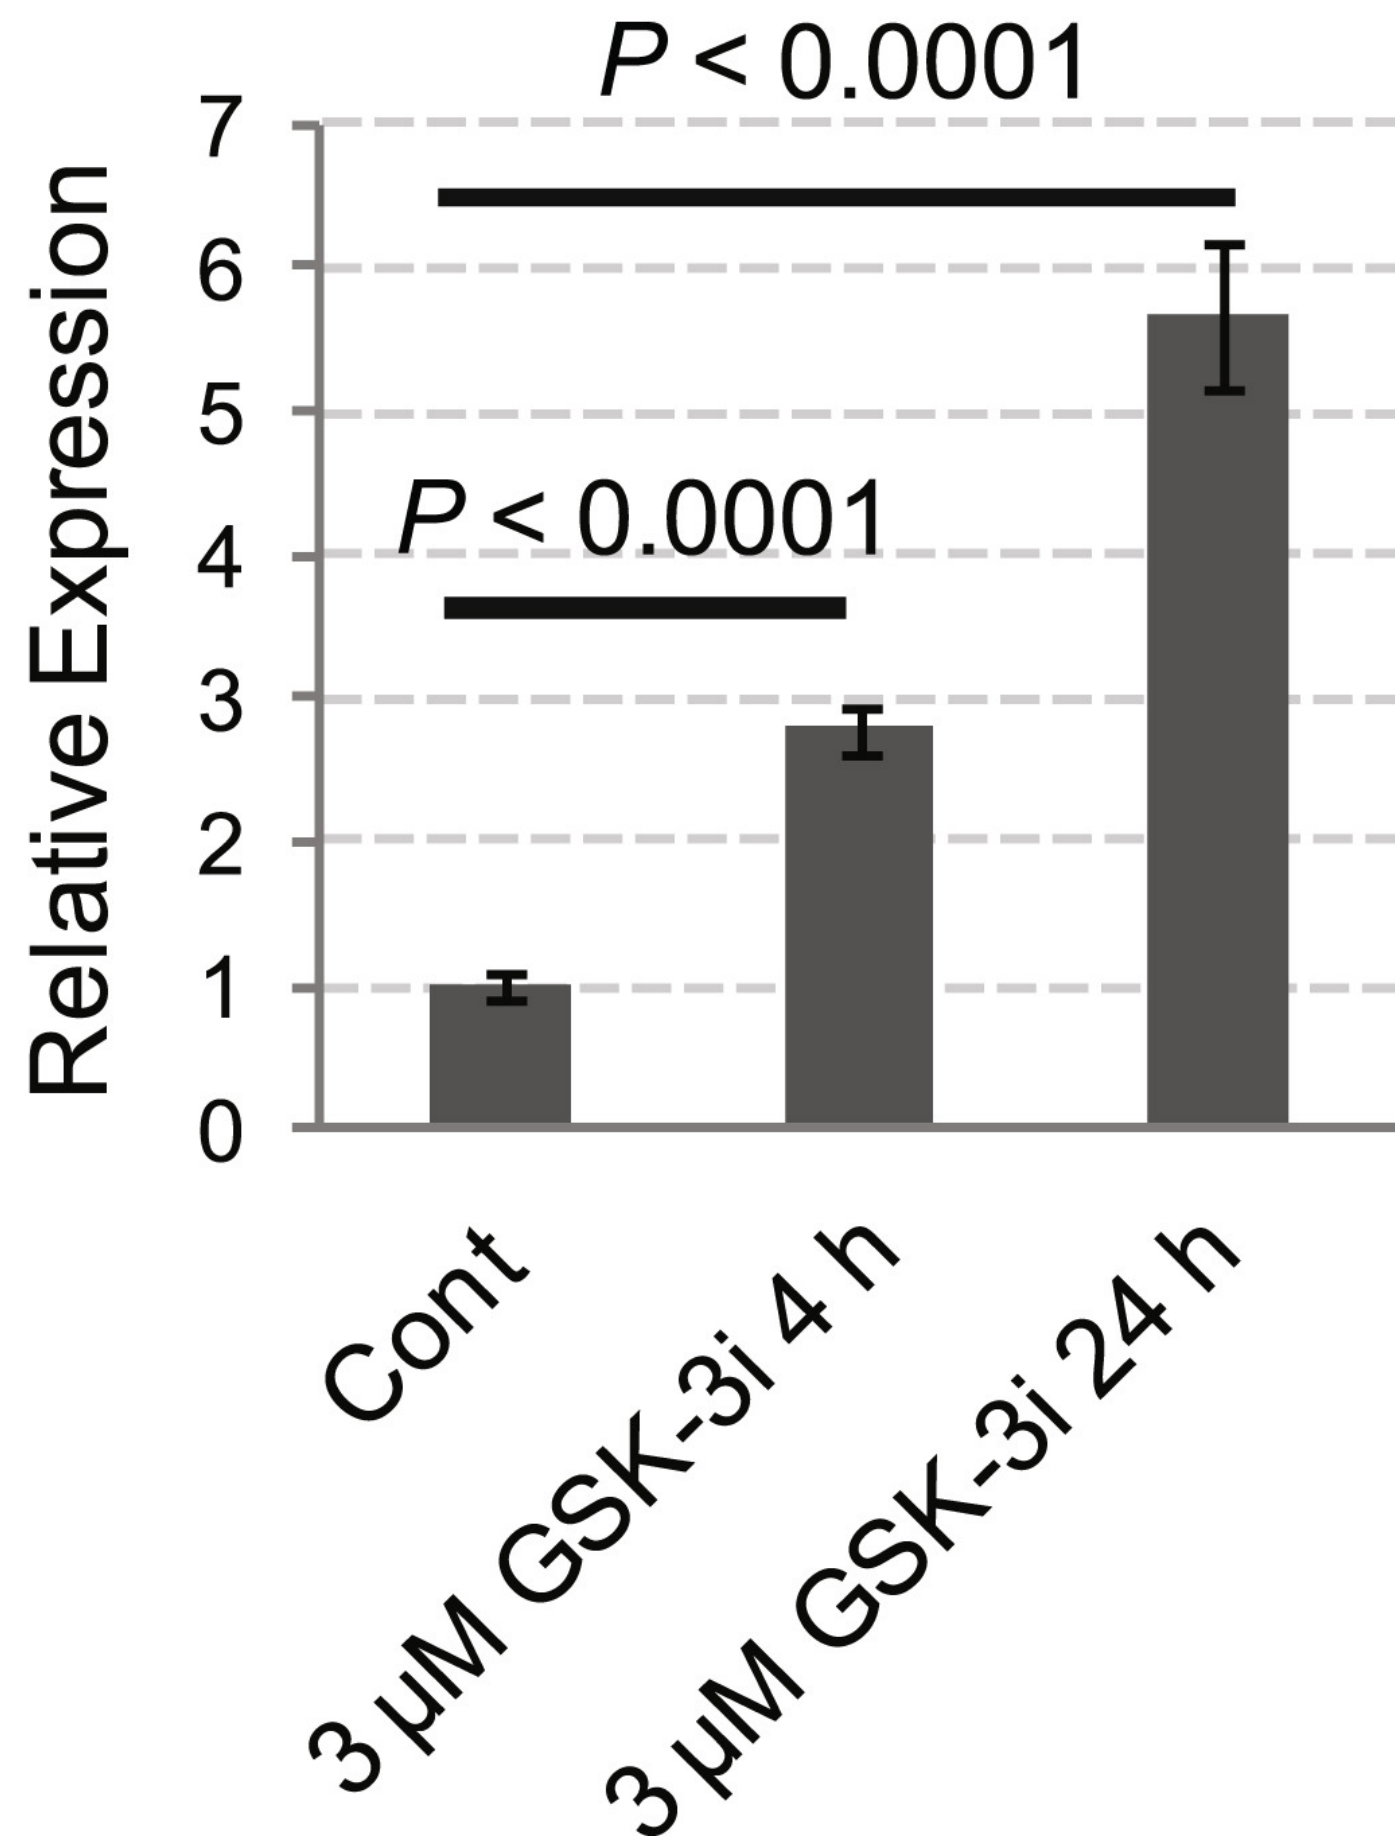

# WM3451 *AXIN2*

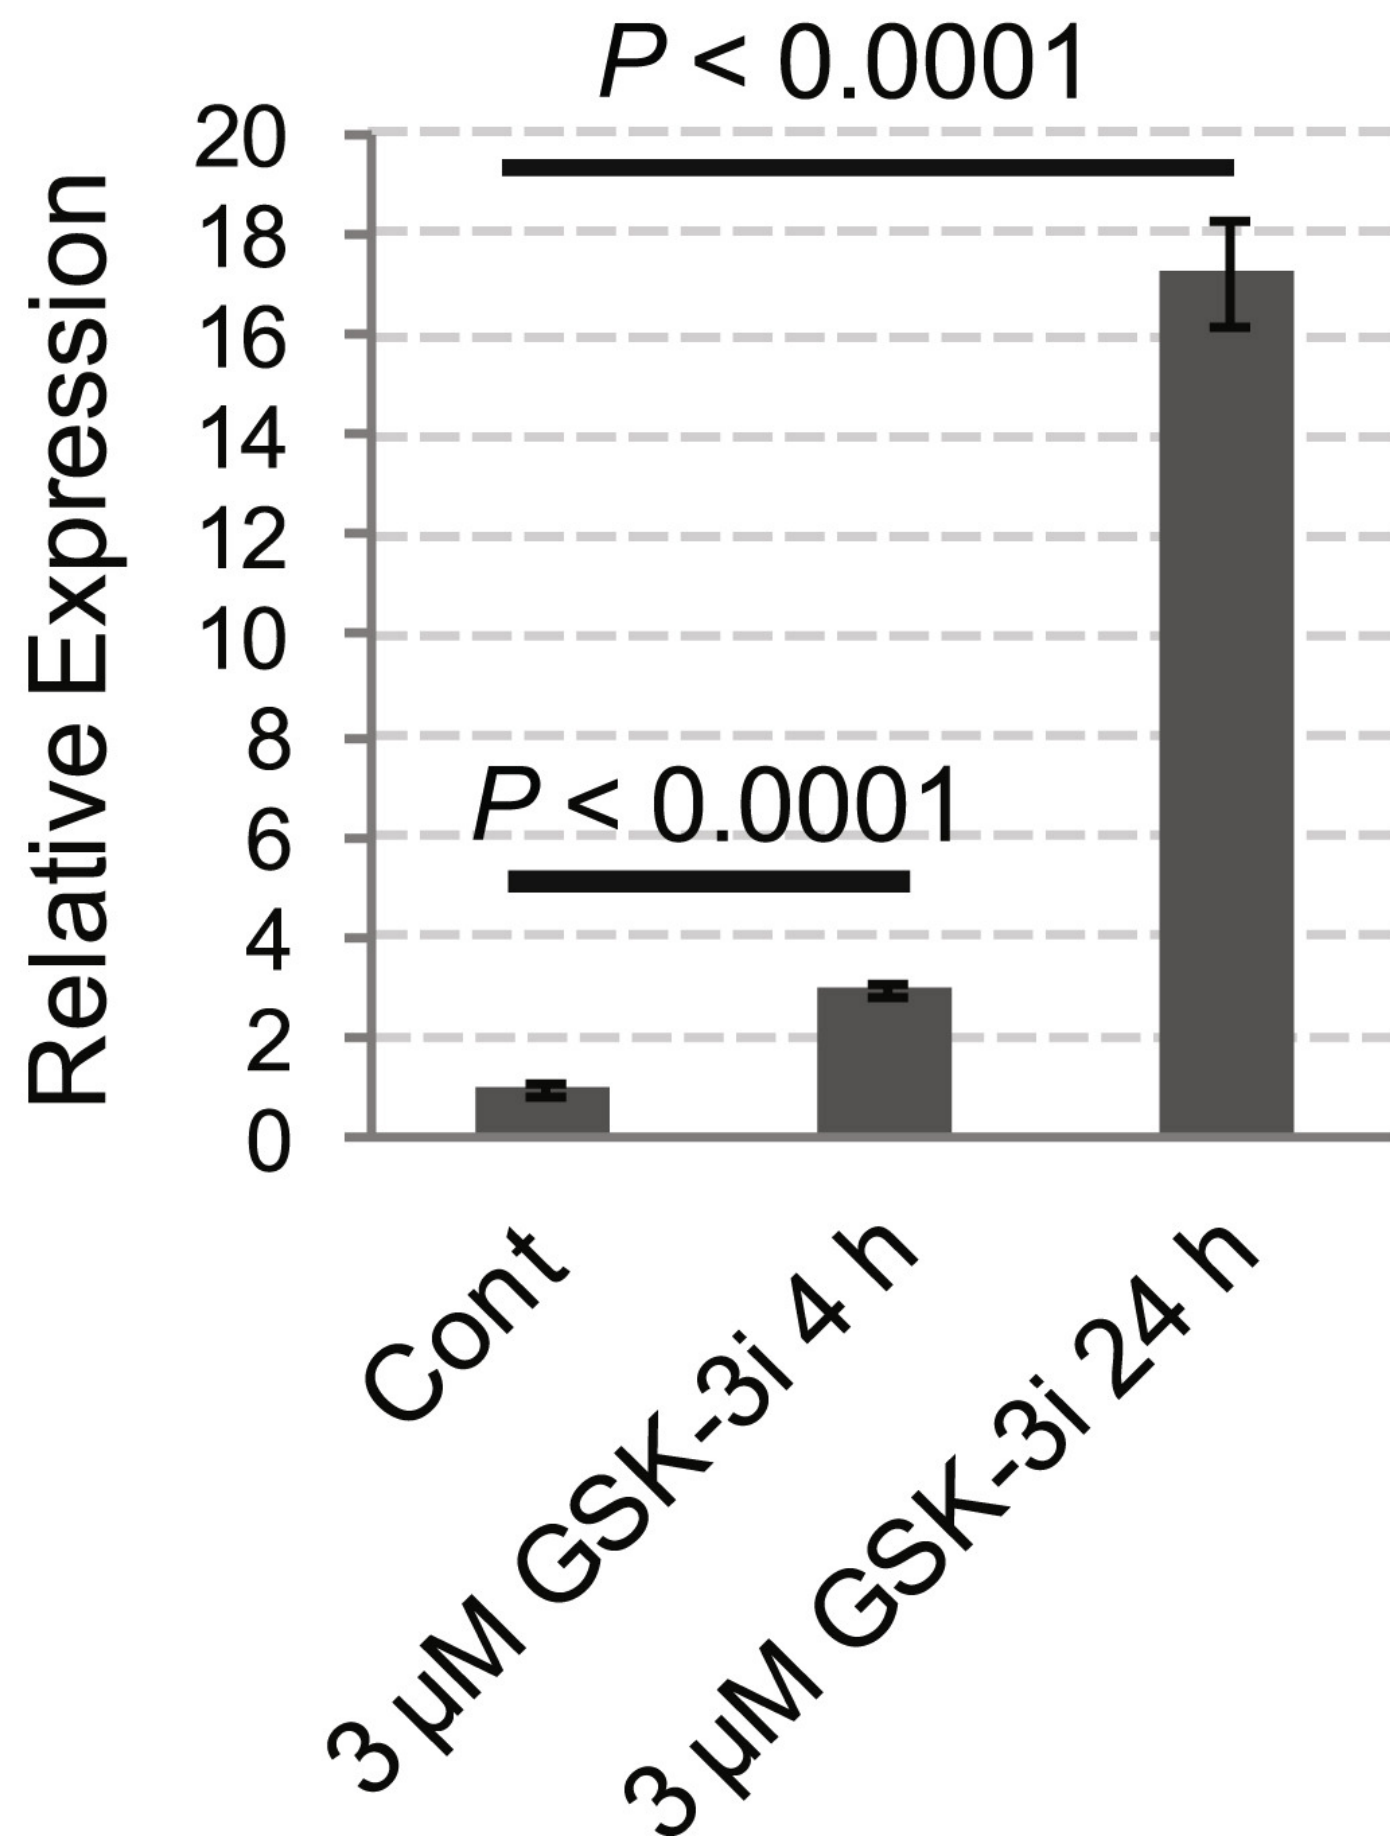

Supplement: NIHMS1823153-supplement-Figure_S4.pdf [file NIHMS1823153-supplement-Figure_S4.pdf]
